# Supplementary material
Source: MDPI journal article supplement (https://www.mdpi.com/2075-4655/5/1/6)

Supplementary figure 3: (A) Multi-dimensional scaling plot of blood (green), ctDNA (orange) and fresh tissues (purple) demonstrating separation of groups; (B) Hierarchical clustering plot showing separate clustering of Blood,ctDNA and fresh tissue groups

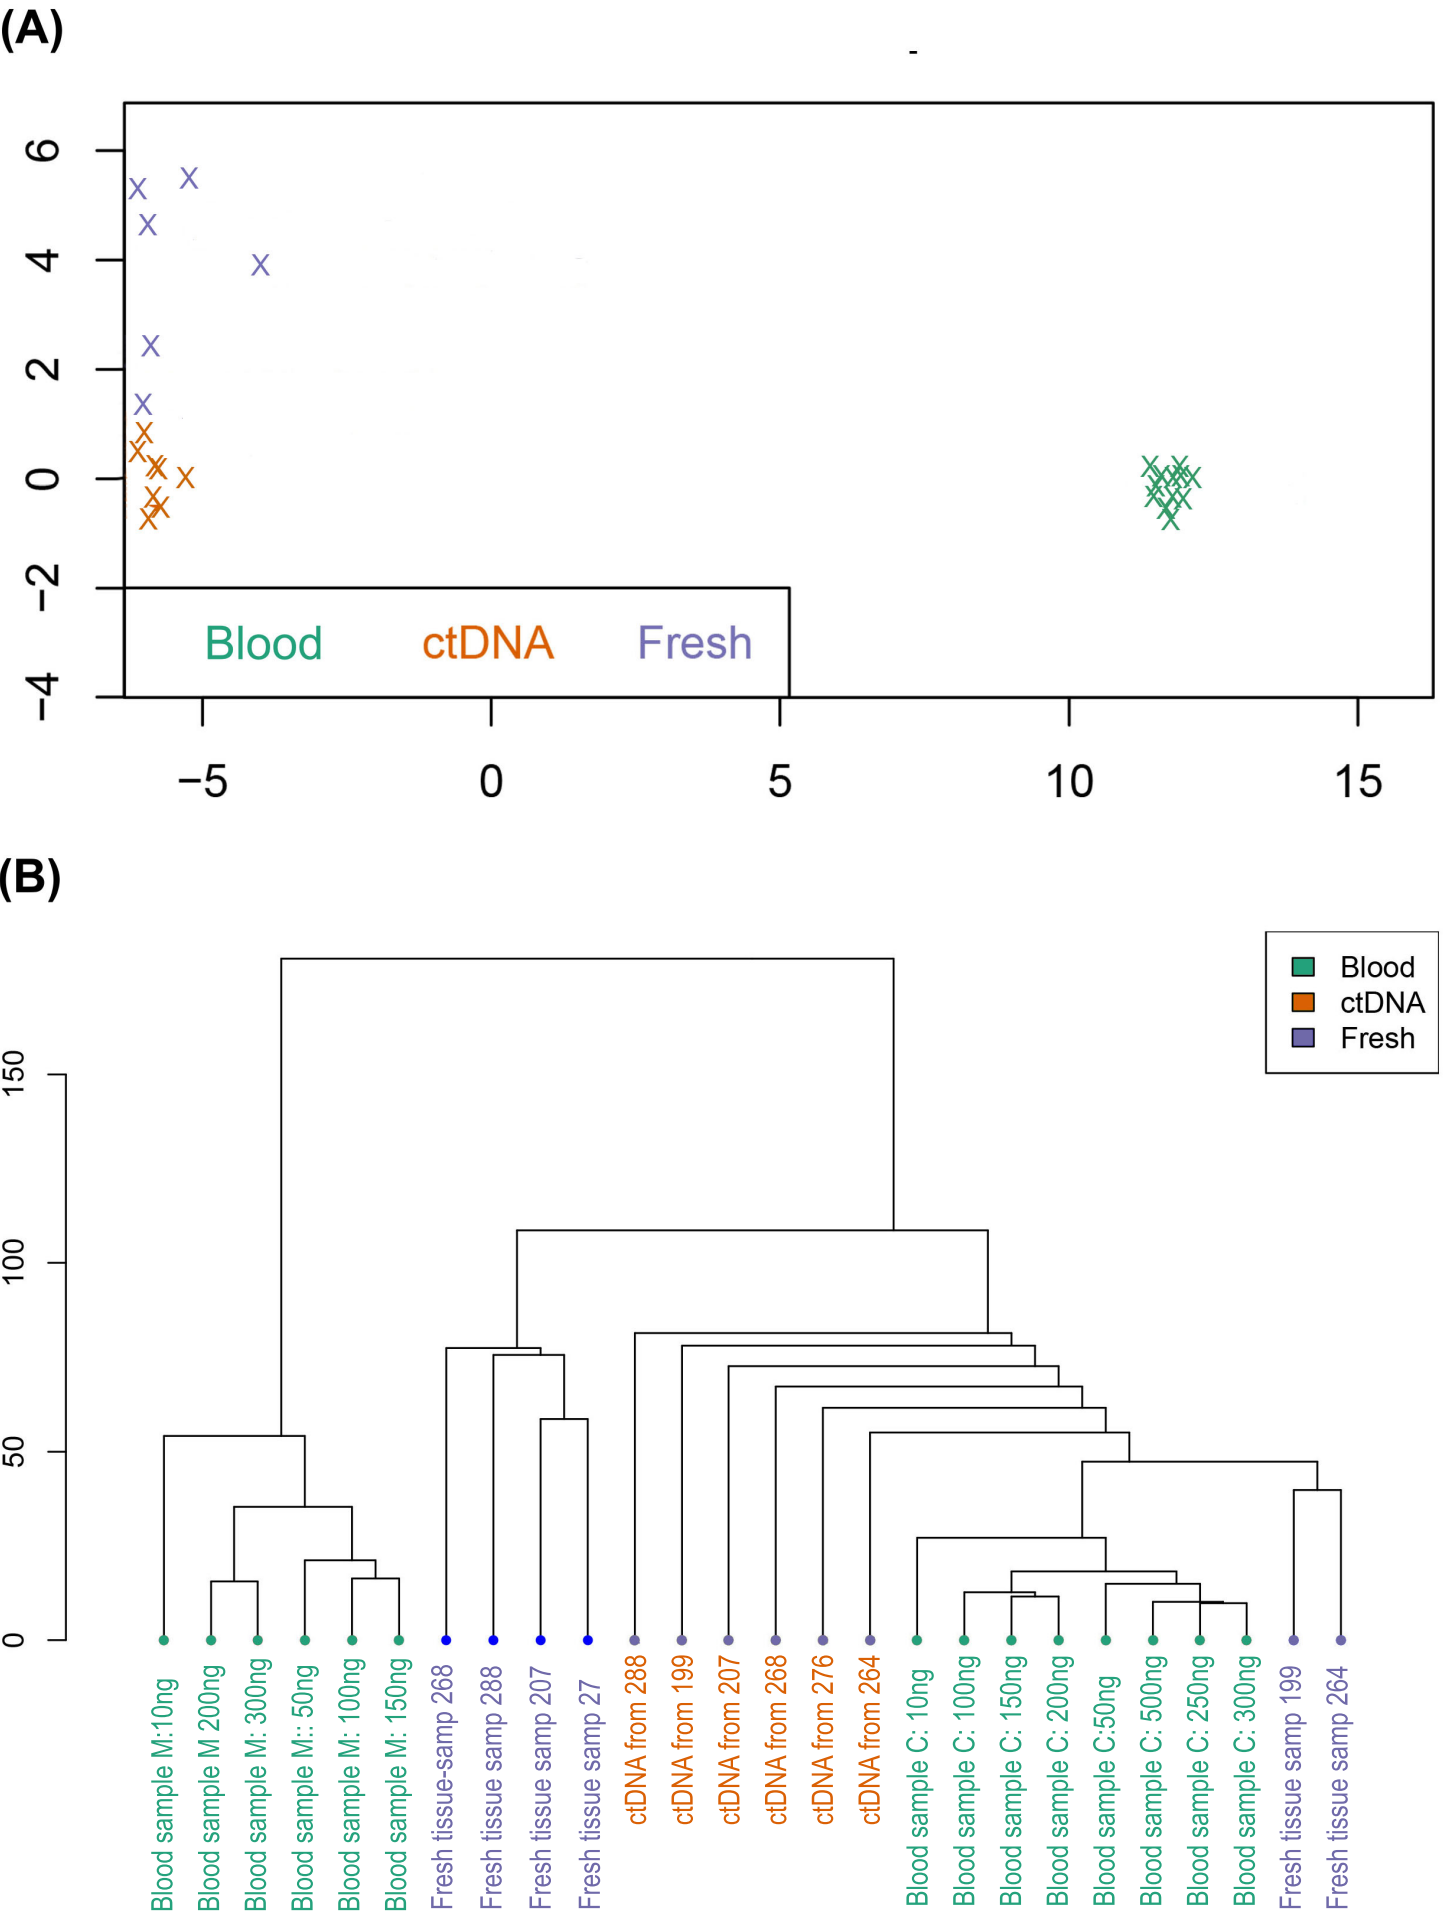

Supplement: s1 [file s1]
