# Supplementary material
Source: MDPI journal article supplement (https://www.mdpi.com/2075-4655/5/1/6)

Supplementary figure 4: Density plot of percentage methylation (beta) vs. density in all tissue types

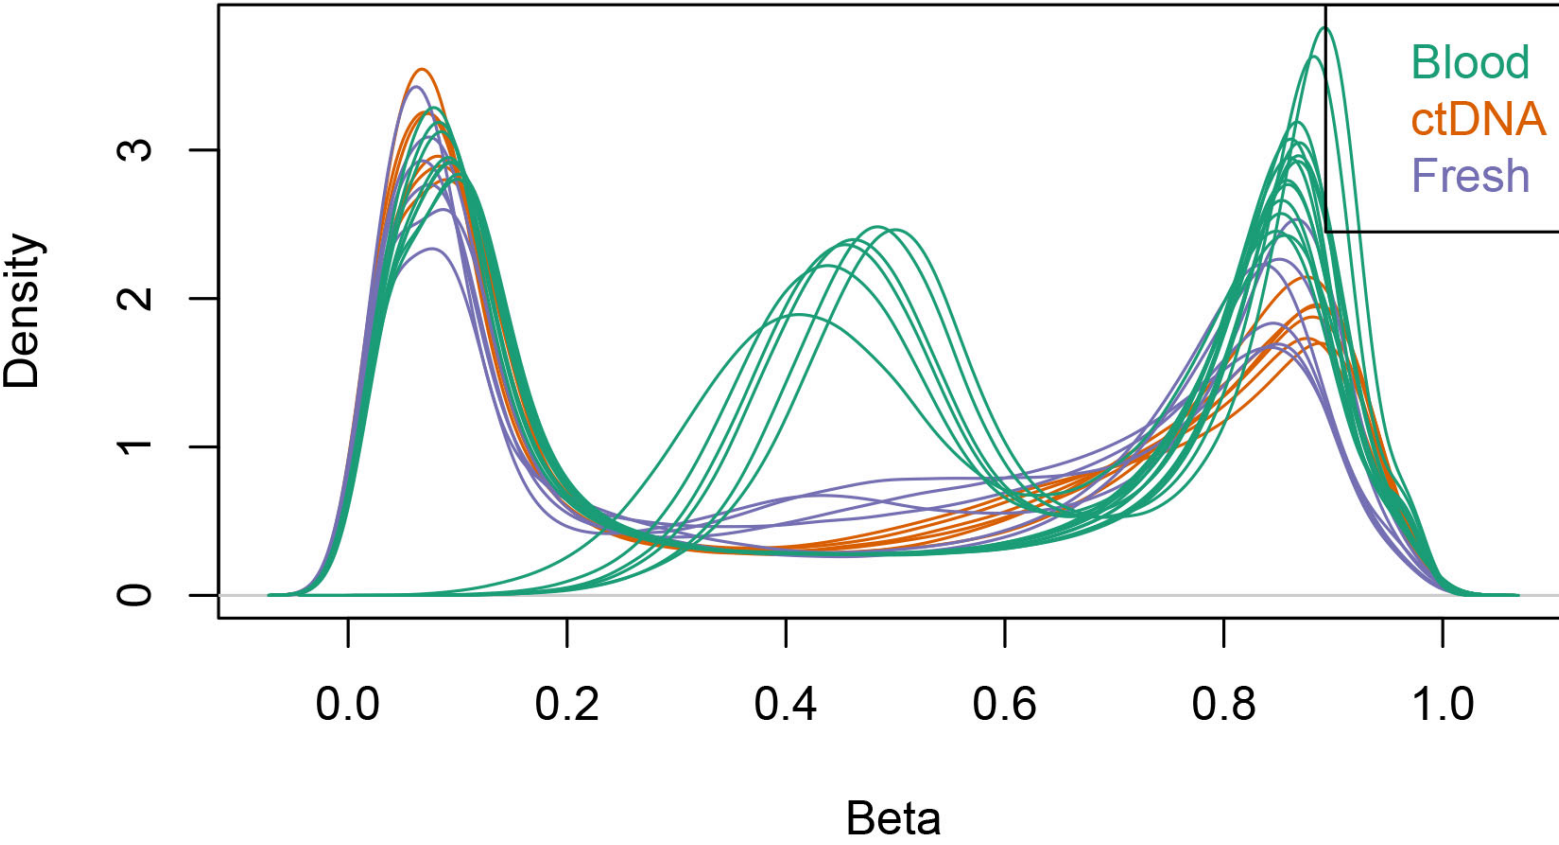

Supplement: s1 [file s1]
