# Supplementary material
Source: MDPI journal article supplement (https://www.mdpi.com/2075-4655/5/1/6)

## Difference vs. average: Bland-Altman of ctDNA vs. fresh tissue

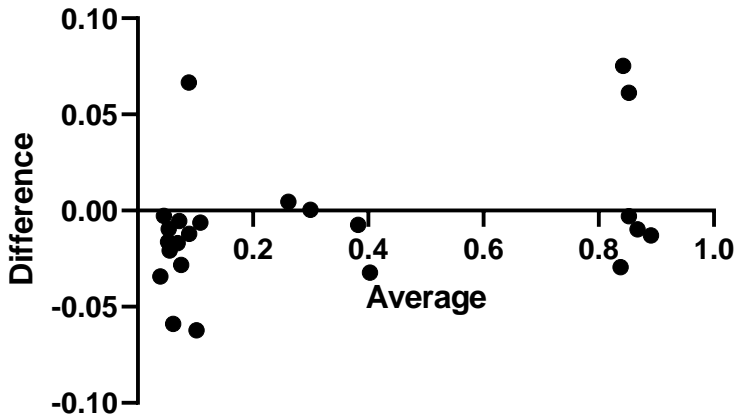

Supplement: s1 [file s1]

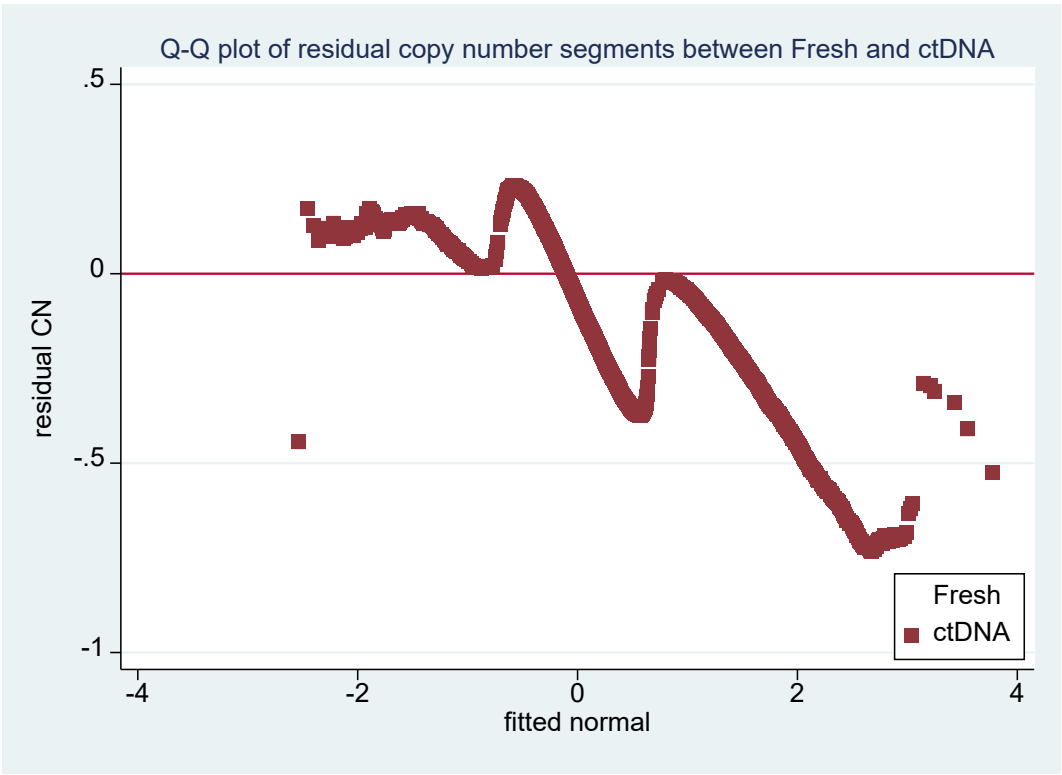

Supplement: s1 [file s1]

# Low input experiments

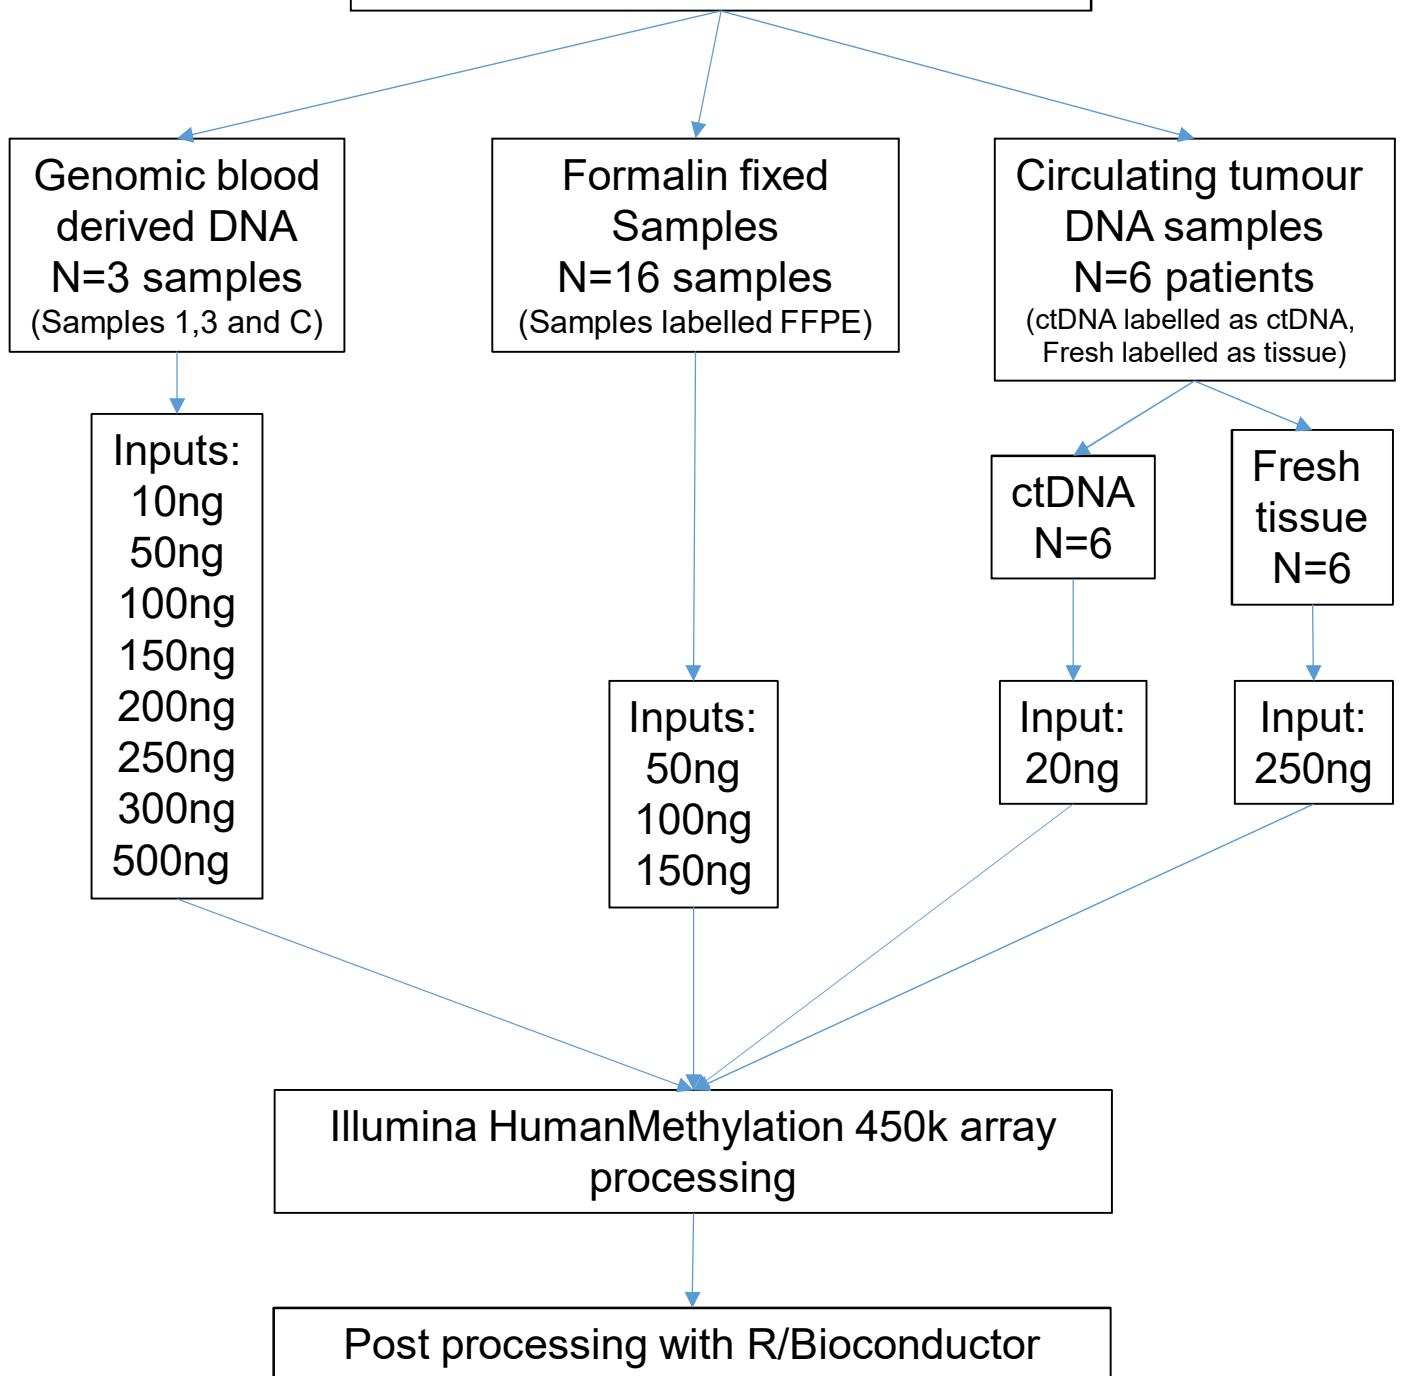

Supplement: s1 [file s1]
